# Supplementary material
Source: MDPI journal article supplement (https://www.mdpi.com/1424-2818/14/9/730)
Supplement: s1 [file s1]

**Table S1.** Results of the Analysis of Variance testing for differences in fish larval densities, zooplankton, fish eggs and chlorophyll-*a*, pH, DO, salinity and temperature in different locations (Watamu vs. Diani), seasons (NEM vs. SEM) and sites (Healthy vs. Degraded). Bold *p*-values indicate a significant result of  $p < 0.05$ .

|               |                      | <b>F</b> | <b><i>p</i></b> |
|---------------|----------------------|----------|-----------------|
| Fish larvae   | Watamu vs. Diani     | 1.45     | 0.23            |
|               | NEM vs. SEM          | 4.10     | <b>*0.047</b>   |
|               | Healthy vs. Degraded | 0.19     | 0.66            |
| Zooplankton   | Watamu vs. Diani     | 1.51     | 0.221           |
|               | NEM vs. SEM          | 7.31     | <b>*0.008</b>   |
|               | Healthy vs. Degraded | 2.78     | 0.07            |
| Fish eggs     | Watamu vs. Diani     | 3.70     | 0.06            |
|               | NEM vs. SEM          | 0.00     | 0.97            |
|               | Healthy vs. Degraded | 3.50     | 0.06            |
| Chl- <i>a</i> | Diani vs. Watamu     | 1.34     | 0.25            |
|               | NEM vs. SEM          | 0.07     | 0.79            |
| pH            | Diani vs. Watamu     | 0.2      | 0.68            |
|               | NEM vs. SEM          | 9.8      | <b>*0.003</b>   |
| DO            | Diani vs. Watamu     | 0.226    | 0.64            |
|               | NEM vs. SEM          | 18.638   | <b>*0.001</b>   |
| Salinity      | Diani vs. Watamu     | 0        | 0.96            |
|               | NEM vs. SEM          | 6        | <b>*0.02</b>    |
| Temperature   | Diani vs. Watamu     | 0.01     | 0.91            |
|               | NEM vs. SEM          | 29.97    | <b>*0.002</b>   |

\* indicates significant difference at  $p < 0.05$
